# Supplementary material for: Transkingdom interactions between Lactobacilli and hepatic mitochondria attenuate western diet-induced diabetes
Source: PubMed Central journal article supplement (PMC7782853; doi:10.1038/s41467-020-20313-x), 2021-01-04
Supplement: 41467_2020_20313_MOESM1_ESM.pdf [file 41467_2020_20313_MOESM1_ESM.pdf]

## Supplementary Figures

### **Transkingdom interactions between *Lactobacilli* and hepatic mitochondria attenuate western diet induced diabetes**

Richard R. Rodrigues<sup>1#</sup>, Manoj Gurung<sup>2#</sup>, Zhipeng Li<sup>2#</sup>, Manuel García-Jaramillo<sup>3</sup>, Renee Greer<sup>2</sup>, Christopher Gaulke<sup>4</sup>, Franziska Bauchinger<sup>5</sup>, Hyekyoung You<sup>2</sup>, Jacob W. Pederson<sup>2</sup>, Stephany Vasquez-Perez<sup>2</sup>, Kimberly D. White<sup>2</sup>, Briana Frink<sup>2</sup>, Benjamin Philmus<sup>1</sup>, Donald B. Jump<sup>3</sup>, Giorgio Trinchieri<sup>6</sup>, David Berry<sup>5</sup>, Thomas J. Sharpton<sup>4</sup>, Amiran Dzutsev<sup>6</sup>, Andrey Morgun<sup>1\*</sup>, Natalia Shulzhenko<sup>2\*</sup>

<sup>1</sup>College of Pharmacy, <sup>2</sup>Veterinary Medicine, <sup>3</sup>College of Public Health and Human Sciences and <sup>4</sup>College of Science, Oregon State University, Corvallis, OR, USA; <sup>5</sup>Department of Microbiology and Ecosystem Science, University of Vienna, Vienna, Austria; <sup>6</sup>Cancer and Inflammation Program, Center for Cancer Research, National Cancer Institute, National Institutes of Health, Bethesda, MD, USA

#equal contribution

\*co-senior authors

Correspondence to: [andriy.morgun@oregonstate.edu](mailto:andriy.morgun@oregonstate.edu) or [natalia.shulzhenko@oregonstate.edu](mailto:natalia.shulzhenko@oregonstate.edu)

## Supplementary Fig 1

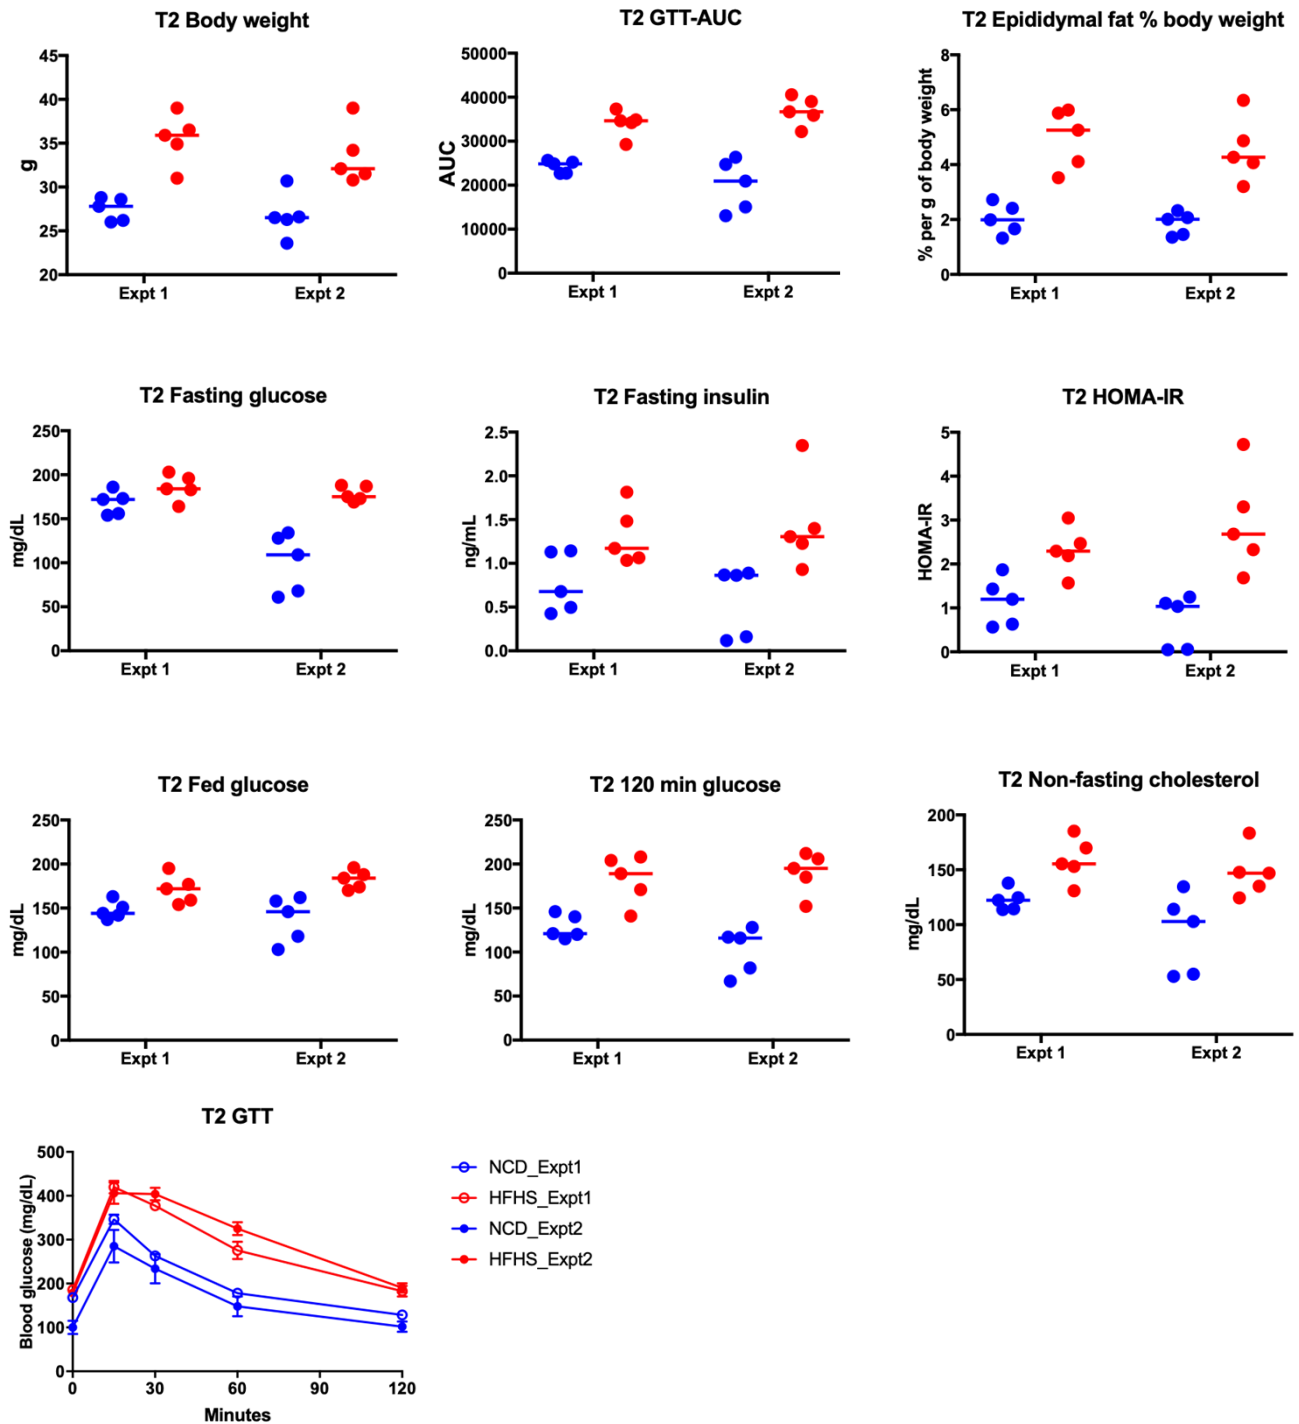

**Figure S1: Changes in metabolic parameters due to diet.**

The blue and red colors indicate levels of metabolic parameters measured in mice fed normal diet (ND, blue) or western diet (WD, red) for 8 weeks. All these parameters are statistically significant (two-tail Mann-Whitney  $p$ -value < 20% in each experiment, Fisher's  $p$ -value over experiments < 5%, and FDR < 10%). Each symbol represent mouse, lines are median values. Source data are provided as a Source Data file.

## Supplementary Fig 2

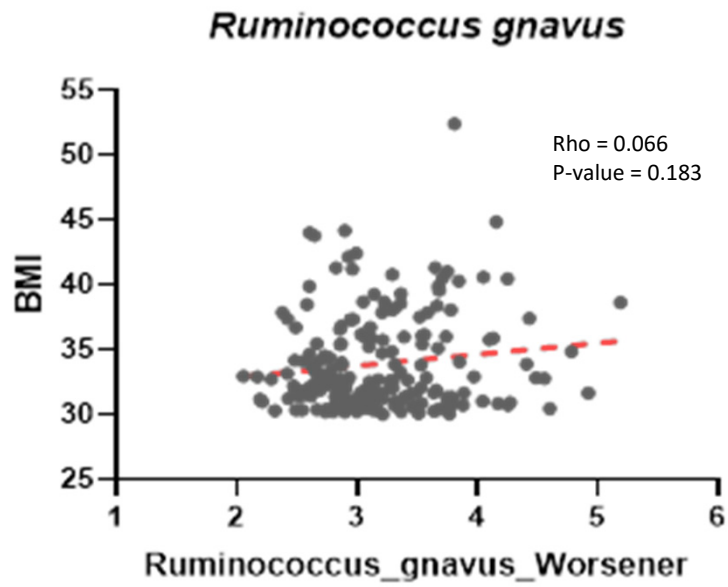

**Figure S2:** Spearman correlation of *Ruminococcus gnavus* abundance in stool with BMI of obese human. The Spearman rho correlation co-efficient and one-tail p-value is provided.

### Supplementary Fig 3

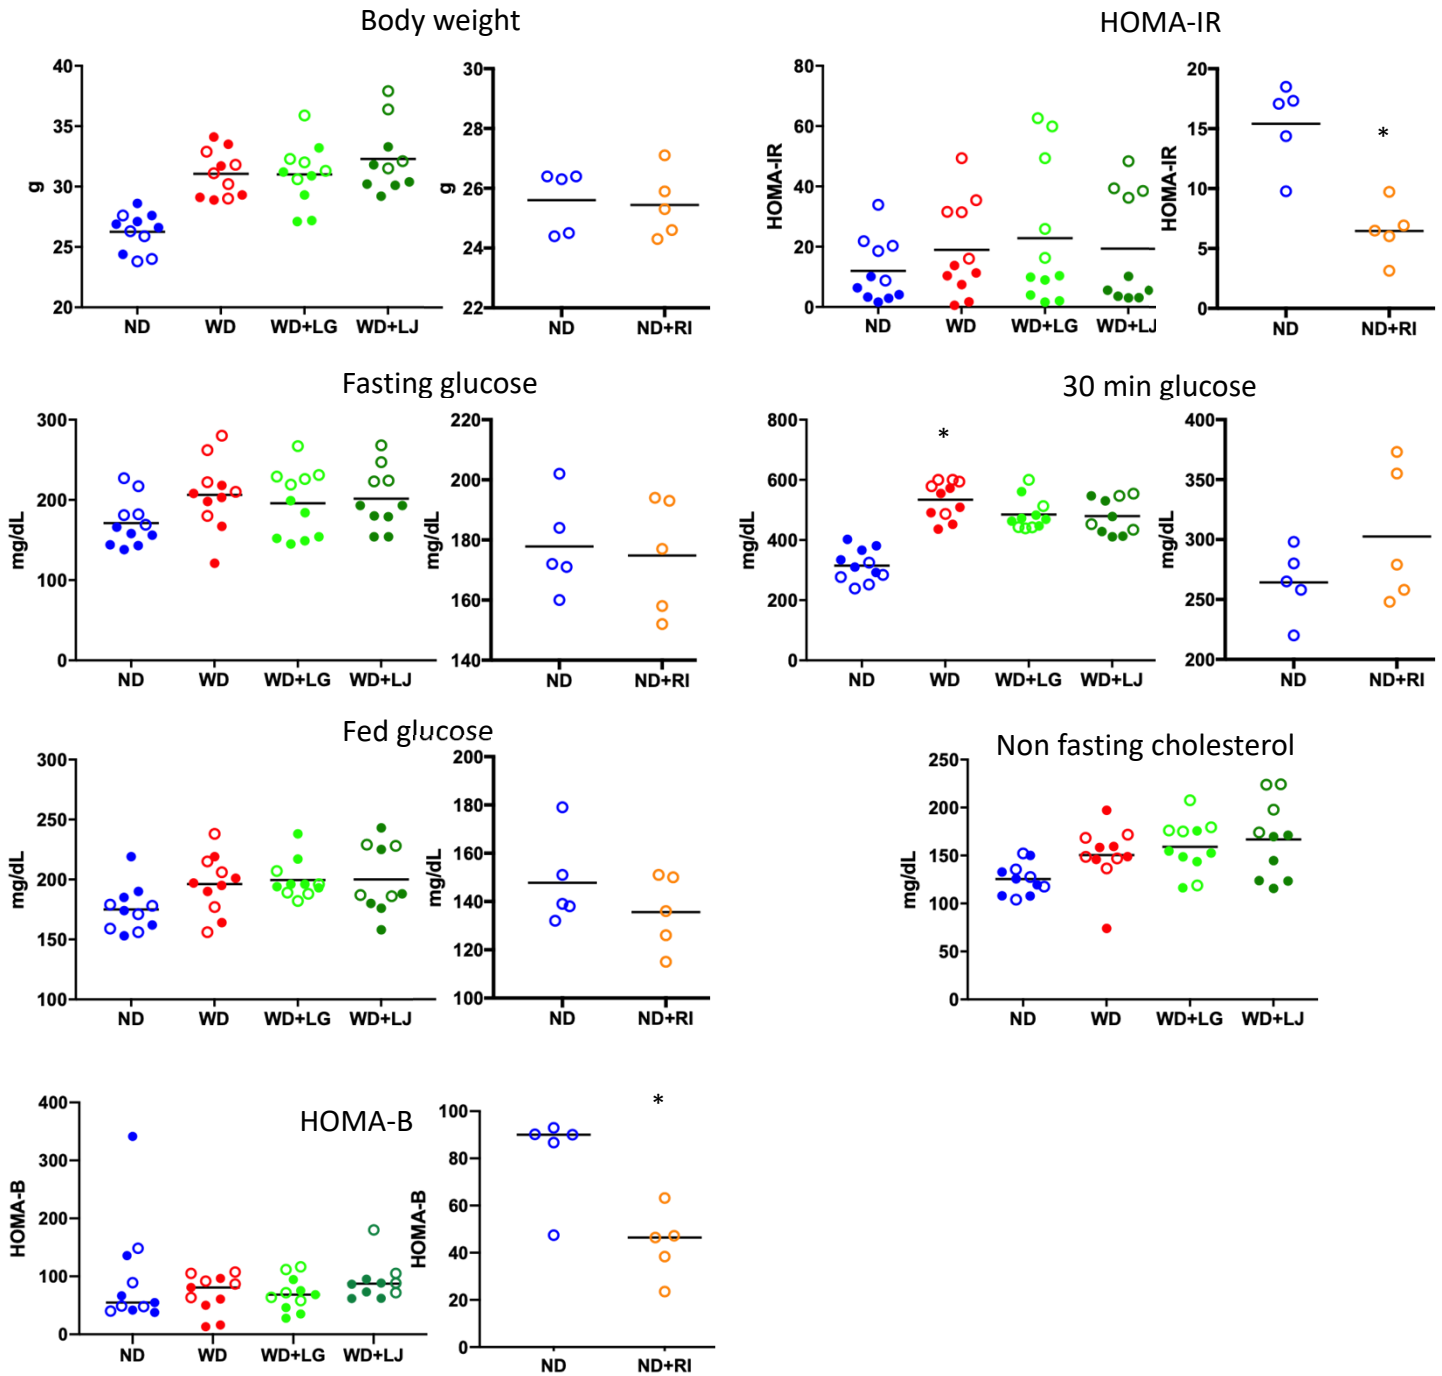

#### Figure S3: Changes in metabolic parameters due to supplementation of candidate microbes.

The blue, red, light green, dark green, and orange colors indicate ND, WD, WD with *L. gasseri* (WD+LG), WD with *L. johnsonii* (WD+LJ), ND with *R. ilealis* (ND+RI), respectively. The metabolic parameters in mice supplemented with or without candidate microbe. Open and closed circles indicate 2 independent experiments. \* indicates statistically significant differences in levels of the parameter between control group (WD for *Lactobacilli*, ND for *R. ilealis*) versus those supplemented with bacteria (one-tail t-test p-value < 5% with FDR < 15%). Each symbol represents mouse, lines are median values, all replicates are shown. Source data are provided as a Source Data file.

## Supplementary Figure 4

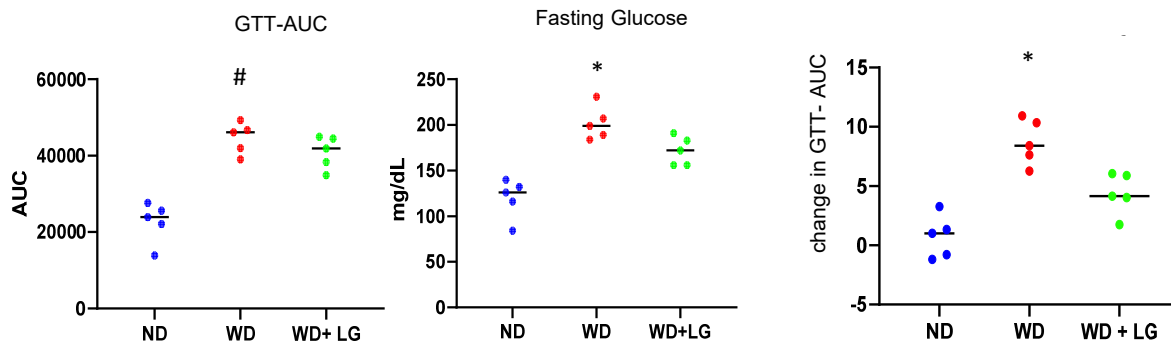

**Figure S4:** Glucose tolerance test and fasting glucose in mice supplemented with *L. gasseri* (LG) after 8 weeks on WD. The right figure shows the change in glucose tolerance test (AUC) after 12 weeks of WD (which was 4 wks of LG), calculated by subtracting the 12 week AUC of each mouse from 8 week AUC (when mice were on WD only) and normalizing by median of AUC change of ND group. \* indicates significant change between control group (WD and WD + LG, one-sided p-value < 5%, Mann-Whitney Test, median). # indicates p-value of 0.07. Each symbol represent mouse, lines are median values, all replicates are shown. Source data are provided as a Source Data file.

## Supplementary Fig 5

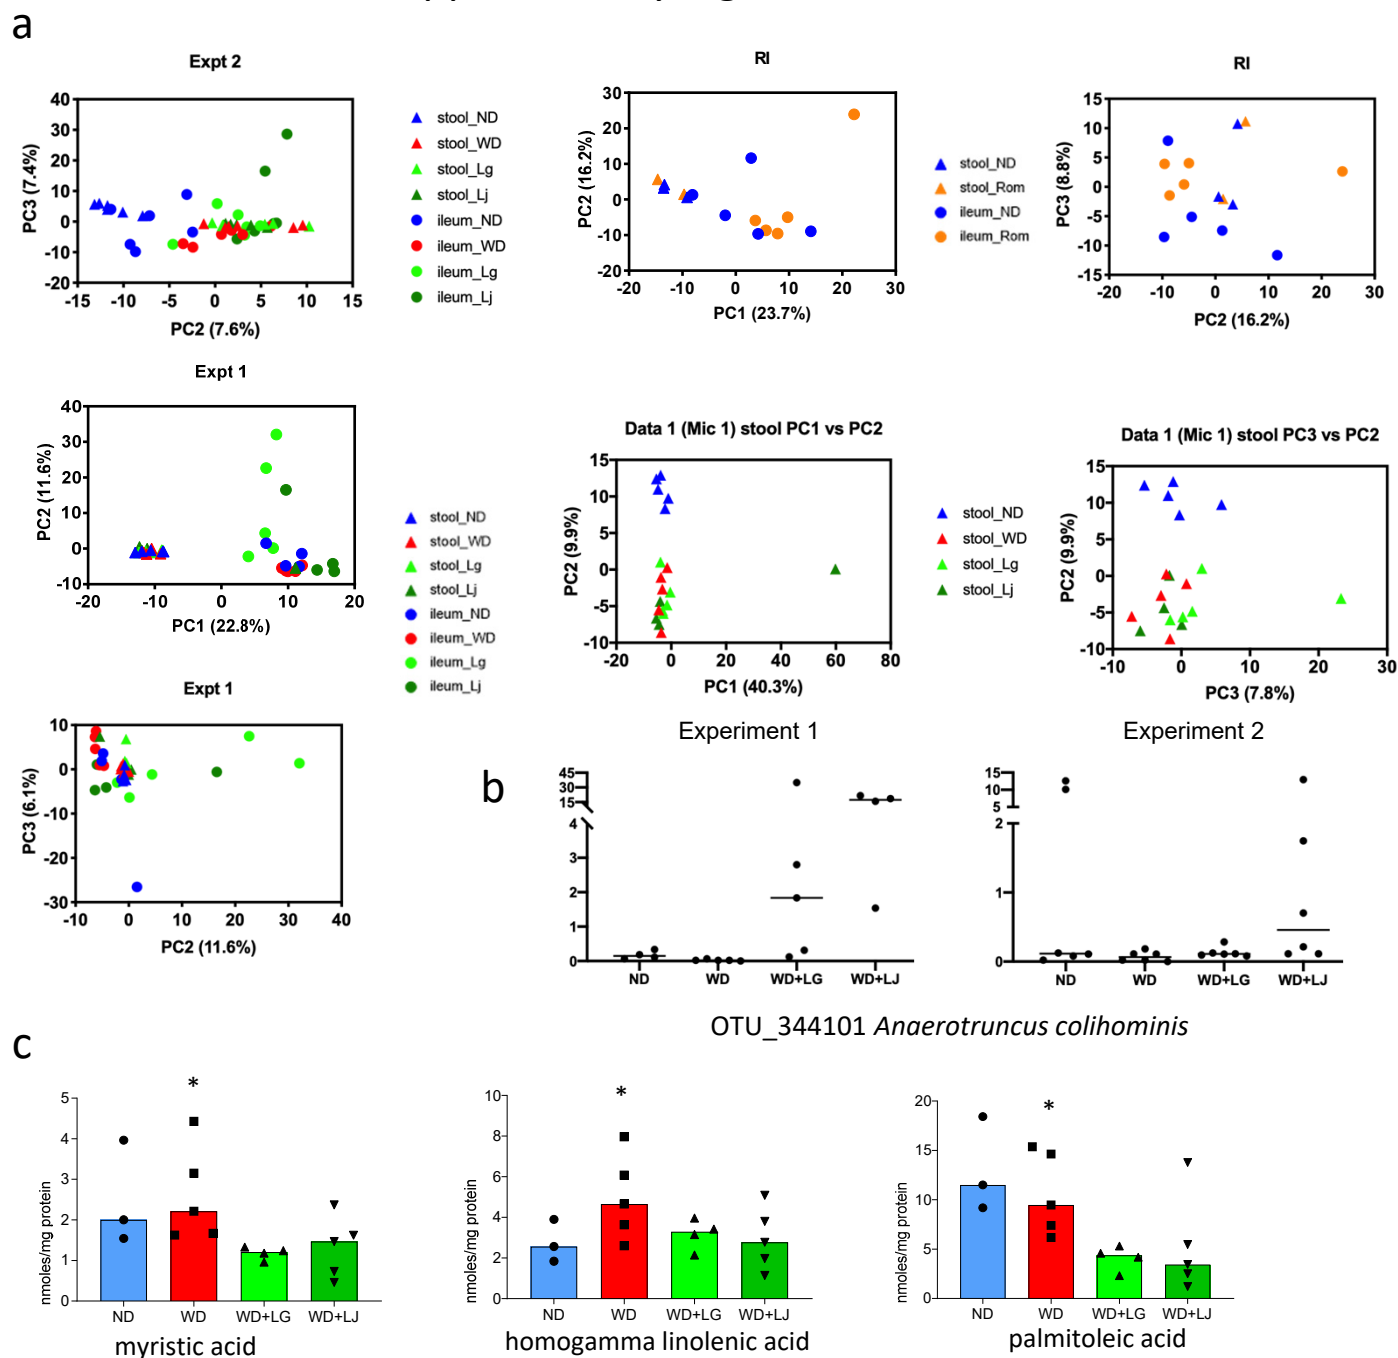

**Figure S5: Effect of microbial supplementation on microbial communities and fatty acids.**

a) Principal Component Analysis of stool (triangle) and ileal (circle) microbial communities of mice on ND, WD, WD+LG, WD+LJ, or RI. b) The ileal abundance of *Anaerotruncus colihominis* in ND, WD, WD+LG, and WD+LJ fed mice. c) The levels of long chain fatty acids in liver of mice supplemented with or without *Lactobacillus* candidates. Asterisk indicates statistically significant differences between WD and groups supplemented with bacteria (one-sided t-test p-value < 5%, except for # p<8%). Each dot represents a mouse, all replicates are shown. Source data are provided as a Source Data file.

Supplementary Figure 6

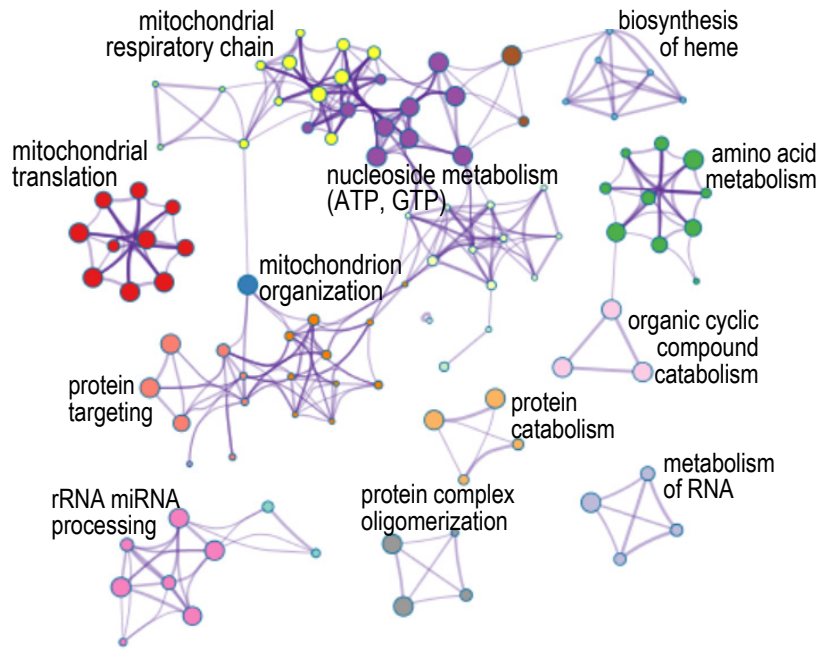

**Figure S6: Functional enrichment for the liver genes upregulated by the *Lactobacillus gasseri/johnsonii*.** Pathways identified by Metascape (<http://metascape.org>).

Supplementary Figure 7

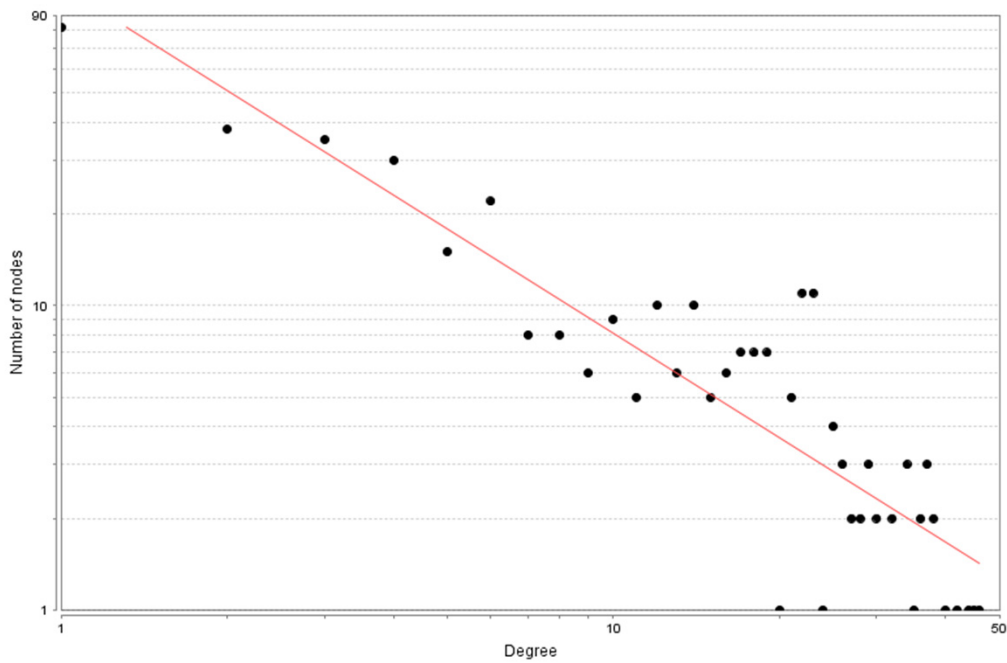

**Figure S7: Power law distribution of nodes in multi-omics network**
