# Supplementary material for: Transkingdom interactions between Lactobacilli and hepatic mitochondria attenuate western diet-induced diabetes
Source: PubMed Central journal article supplement (PMC7782853; doi:10.1038/s41467-020-20313-x), 2021-01-04
Supplement: 41467_2020_20313_MOESM3_ESM.pdf [file 41467_2020_20313_MOESM3_ESM.pdf]

**Description of Additional Supplementary Files**

File Name: Supplementary Data1-16-oct29v2.xlsx

Description: Additional results derived from the various analyses described in the accompanying manuscript.
